# Supplementary material
Source: MDPI journal article supplement (https://www.mdpi.com/1424-8247/16/5/639)
Supplement: s1 [file s1]

# Supplementary Materials

## Acyl hydrazides and acyl hydrazones as high performance chemical exchange saturation transfer MRI contrast agents

Shaowei Bo<sup>1,†</sup>, Dong Zhang<sup>2,†</sup>, Mengjie Ma<sup>2</sup>, Xukai Mo<sup>2</sup>, Julia Stabinska<sup>3,4</sup>, Michael T. McMahon<sup>3,4,\*</sup>, Changzheng Shi<sup>2,\*</sup>, Liangping Luo<sup>1,2,\*</sup>

<sup>1</sup> Department of Medical Imaging, The Affiliated Guangdong Second Provincial General Hospital of Jinan University, Guangzhou 510317, China.

<sup>2</sup> Medical Imaging Center, The First Affiliated Hospital of Jinan University, Guangzhou 510632, China.

<sup>3</sup> The Russell H. Morgan Department of Radiology and Radiological Science, The Johns Hopkins University School of Medicine, Baltimore, MD 21287, USA.

<sup>4</sup> F.M. Kirby Research Center for Functional Brain Imaging, Kennedy Krieger Institute, Baltimore, MD 21287, USA

\* Correspondence: tsczcn@jnu.edu.cn(C.S.); mcmahon@mri.jhu.edu(M.T.M.); tluolp@jnu.edu.cn(L.L.)

† These authors contributed equally to this work.

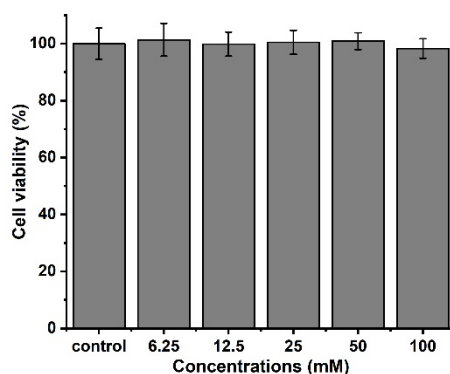

**Figure S1.** Cytotoxicity assay of ADH on 4T1 cells with different concentration range.

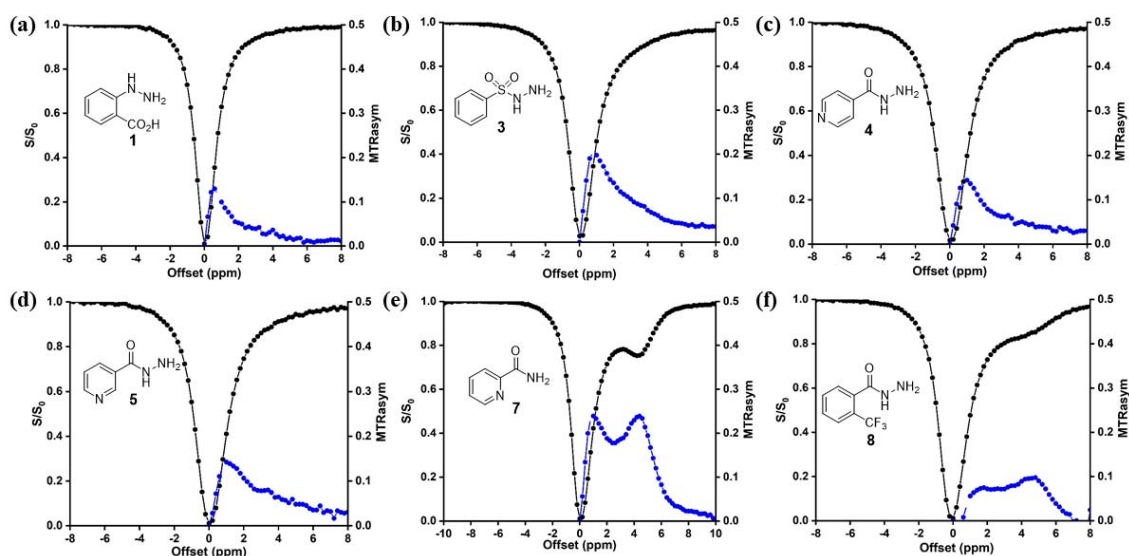



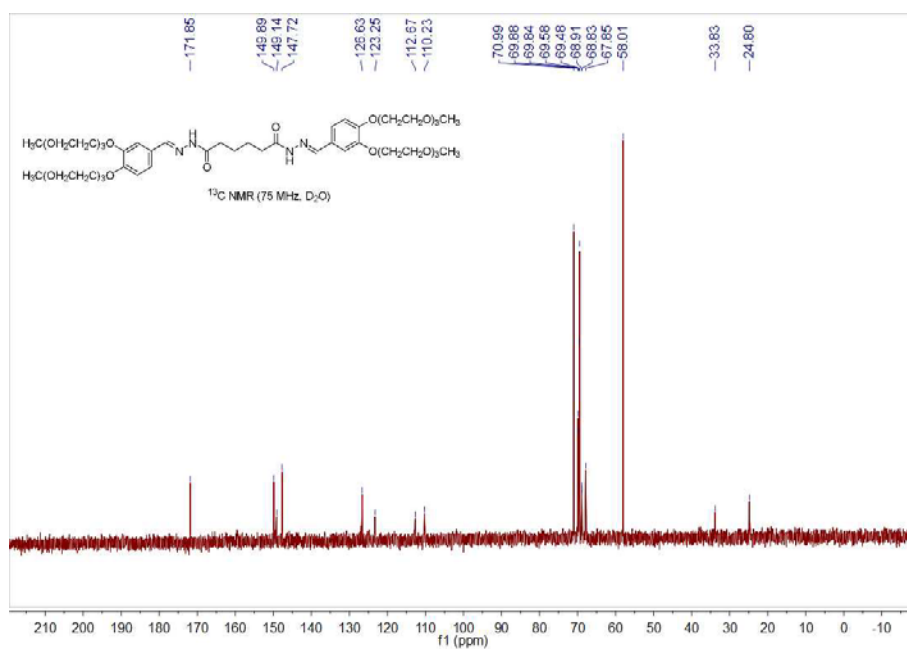

Figure S5.  $^{13}\text{C}$  NMR of acyl hydrazone **17**

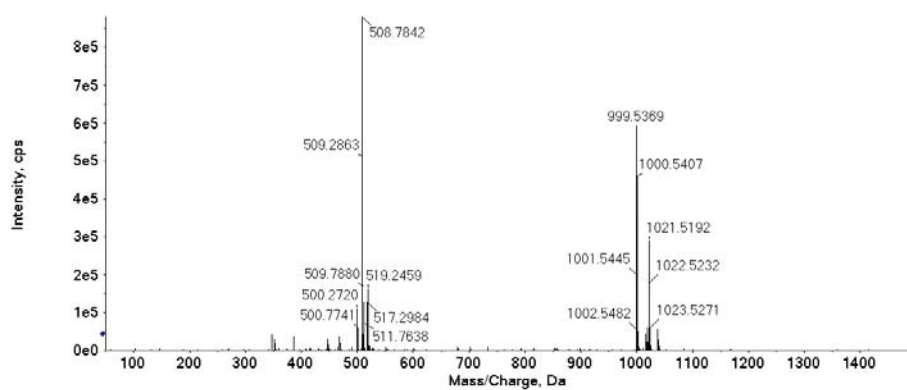

Figure S6. HRMS of acyl hydrazone **17**, calcd for  $\text{C}_{48}\text{H}_{79}\text{N}_4\text{O}_{18}^+$  ( $[\text{M}+\text{H}]^+$ ) 999.5384, found 999.5369.
